# Supplementary material for: Consumer Perceptions of Safety Information in Direct-to-Consumer Print Advertisements for Alzheimer Drugs
Source: PubMed Central journal article supplement (PMC11364991; doi:10.1001/jamanetworkopen.2024.31110), 2024-08-30
Supplement: jamanetwopen-e2431110-s002.pdf [file jamanetwopen-e2431110-s002.pdf]

## Data Sharing Statement

Markell. Consumer Perceptions of Safety Information in Direct-to-Consumer Print Advertisements for Alzheimer Drugs. *JAMA Netw Open*. Published September 03, 2024. doi:10.1001/jamanetworkopen.2024.31110

### Data

**Data available:** Yes

**Data types:** Other (please specify)

**Additional Information:** Data will be available upon request

**How to access data:** Data will be available upon request - please email [jmarkel4@jhu.edu](mailto:jmarkel4@jhu.edu)

**When available:** With publication

### Supporting Documents

**Document types:** None

### Additional Information

**Who can access the data:** Anyone requesting the data

**Types of analyses:** Any purpose

**Mechanisms of data availability:** With investigator support/after approval of a proposal
